# Supplementary material for: Modifiable risk factors of vaccine hesitancy: insights from a mixed methods multiple population study combining machine learning and thematic analysis during the COVID-19 pandemic
Source: Springer Nature journal article supplement (doi:10.1186/s12916-025-03953-y), 2025-03-12
Supplement: MOESM1 [file 12916_2025_3953_MOESM1_ESM.pdf]

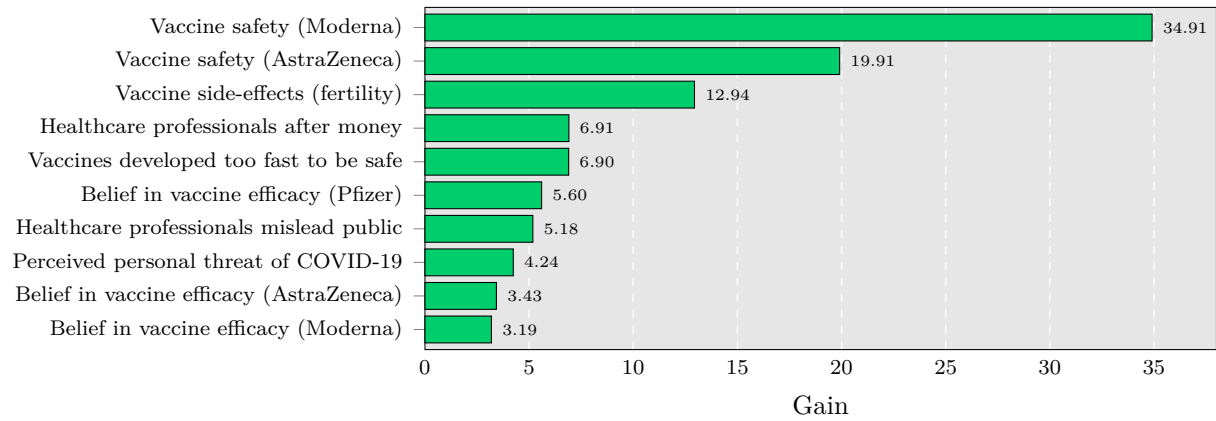

(a) *Ten most important variables and their contribution to the model*

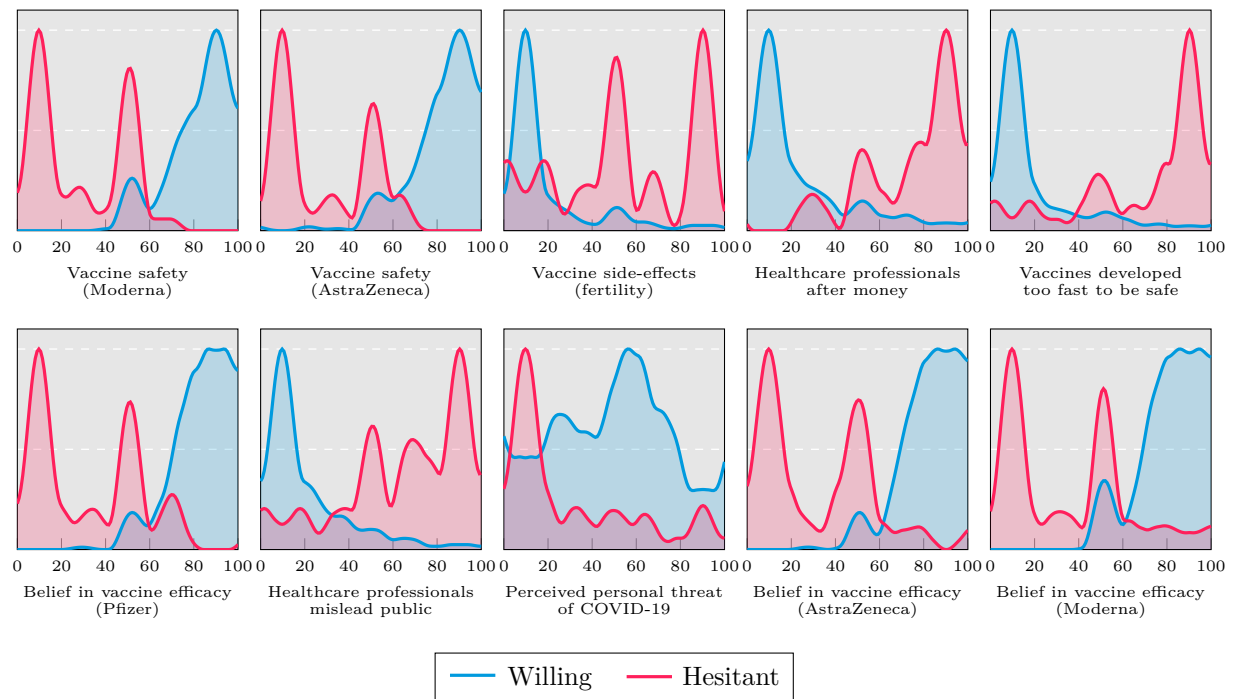

(b) *Distribution of responses for the top ten predictors in the two groups*

**Additional File: Figure S1**
